# Supplementary material
Source: PubMed Central journal article supplement (PMC4083794)
Supplement: rspb20140786supp1.pdf [file rspb20140786supp1.pdf]

| ID (batch number A12/138) | Limb (R/L) | Stimulated (No, Yes) | TA volume (mm <sup>3</sup> ) | EDL volume (mm <sup>3</sup> ) | Anterior cortical thickness profile (mm) |       |       |       |       |       |       |       |       |       | Targetted antero-distal region |                              |
|---------------------------|------------|----------------------|------------------------------|-------------------------------|------------------------------------------|-------|-------|-------|-------|-------|-------|-------|-------|-------|--------------------------------|------------------------------|
|                           |            |                      |                              |                               | 1                                        | 2     | 3     | 4     | 5     | 6     | 7     | 8     | 9     | 10    | bone volume (mm <sup>3</sup> ) | bone area (mm <sup>2</sup> ) |
| rat1                      | L          | yes                  | 61.2                         | 14.1                          | 1.128                                    | 0.458 | 0.958 | 0.810 | 0.494 | 0.764 | 1.051 | 1.459 | 1.111 | 0.706 | 24.2                           | 7.5                          |
|                           | R          | no                   | 83.0                         | 20.1                          | 1.080                                    | 0.559 | 0.860 | 0.947 | 0.748 | 0.803 | 0.820 | 0.755 | 0.688 | 0.680 |                                |                              |
| rat2                      | L          | yes                  | 63.5                         | 18.1                          | 0.841                                    | 0.519 | 0.544 | 0.732 | 0.567 | 0.774 | 0.898 | 0.979 | 0.926 | 0.850 | 19.9                           | 5.8                          |
|                           | R          | no                   | 83.4                         | 22.3                          | 0.975                                    | 0.530 | 0.664 | 0.676 | 0.665 | 0.751 | 0.981 | 0.929 | 0.730 | 0.656 |                                |                              |
| rat3                      | L          | yes                  | 54.8                         | 14.2                          | 0.873                                    | 0.350 | 0.500 | 0.715 | 0.700 | 0.743 | 0.734 | 0.898 | 1.071 | 0.830 | 20.0                           | 5.9                          |
|                           | R          | no                   | 81.5                         | 18.0                          | 0.882                                    | 0.361 | 0.575 | 0.778 | 0.795 | 0.852 | 0.791 | 0.829 | 0.735 | 0.711 |                                |                              |
| rat4                      | L          | yes                  | 59.7                         | 14.9                          | 0.817                                    | 0.359 | 0.546 | 0.489 | 0.624 | 0.734 | 0.690 | 0.895 | 1.162 | 0.663 | 21.7                           | 6.3                          |
|                           | R          | no                   | 69.4                         | 16.6                          | 0.872                                    | 0.376 | 0.399 | 0.528 | 0.601 | 0.721 | 0.779 | 0.776 | 0.597 | 0.600 |                                |                              |
| rat5                      | L          | yes                  | 86.1                         | 18.4                          | 0.817                                    | 0.490 | 0.564 | 0.406 | 0.685 | 0.786 | 0.971 | 1.040 | 0.857 | 0.681 | 17.5                           | 5.2                          |
|                           | R          | no                   | 81.4                         | 18.8                          | 1.068                                    | 0.440 | 0.339 | 0.662 | 0.567 | 0.823 | 0.982 | 0.962 | 0.779 | 0.696 |                                |                              |
| rat6                      | L          | yes                  | 63.0                         | 17.7                          | 0.929                                    | 0.394 | 0.588 | 0.460 | 0.619 | 0.784 | 0.712 | 0.941 | 0.995 | 0.694 | 17.5                           | 5.2                          |
|                           | R          | no                   | 83.2                         | 21.3                          | 1.076                                    | 0.379 | 0.597 | 0.359 | 0.781 | 0.791 | 0.779 | 0.818 | 0.676 | 0.767 |                                |                              |
| rat7                      | L          | no                   | 74.1                         | 16.8                          | 0.722                                    | 0.488 | 0.571 | 0.466 | 0.599 | 0.781 | 0.823 | 0.886 | 0.707 | 0.589 | 17.5                           | 5.2                          |
|                           | R          | no                   | 76.1                         | 17.4                          | 0.983                                    | 0.473 | 0.611 | 0.446 | 0.567 | 0.801 | 0.862 | 0.932 | 0.727 | 0.685 |                                |                              |
| rat8                      | L          | no                   | 88.7                         | 20.7                          | 0.986                                    | 0.385 | 0.532 | 0.427 | 0.741 | 0.808 | 0.794 | 0.967 | 0.733 | 0.689 | 17.5                           | 5.2                          |
|                           | R          | no                   | 92.4                         | 20.7                          | 0.928                                    | 0.351 | 0.597 | 0.432 | 0.748 | 0.758 | 0.875 | 0.858 | 0.800 | 0.775 |                                |                              |
| rat9                      | L          | no                   | 89.1                         | 20.3                          | 0.893                                    | 0.488 | 0.494 | 0.507 | 1.016 | 0.786 | 1.008 | 1.118 | 0.864 | 0.759 | 17.5                           | 5.2                          |
|                           | R          | no                   | 91.7                         | 21.2                          | 0.942                                    | 0.483 | 0.498 | 0.510 | 0.874 | 0.905 | 0.961 | 1.044 | 0.867 | 0.749 |                                |                              |

TA = Tibialis anterior muscle

EDL = Extensor digitorum longus muscle
